# Supplementary material for: Reproducibility of the German and Slovakian Versions of the Dietary Habits and Nutrition Beliefs Questionnaire (KomPAN)
Source: MDPI journal article supplement (doi:10.3390/nu14224893), 2022-11-19
Supplement: s1 [file s1]

Table S1. Nutrition questionnaire according to the number of categories of responses in students from Germany (%)

| Question                                               | No. of Cat. | Test |       |      |      |      |      |   | Retest |      |      |      |      |      |   | <i>p</i> |
|--------------------------------------------------------|-------------|------|-------|------|------|------|------|---|--------|------|------|------|------|------|---|----------|
|                                                        |             | 1    | 2     | 3    | 4    | 5    | 6    | 7 | 1      | 2    | 3    | 4    | 5    | 6    | 7 |          |
| DH-Number of meals a day                               | 5           | 1.3  | 2.4   | 55.1 | 20.0 | 2.7  |      |   | 1.4    | 19.3 | 64.6 | 11.7 | 3.1  |      |   | ns       |
| DH-Regularity of consuming meals                       | 3           | 32.1 | 54.9  | 13.0 |      |      |      |   | 34.3   | 53.6 | 11.6 | 0.5  |      |      |   | ns       |
| DH-Frequency of snacking between meals                 | 6           | 0.4  | 5.8   | 12.9 | 38.7 | 27.1 | 15.1 |   | 0.4    | 10.3 | 16.4 | 36.0 | 24.4 | 12.5 |   | ns       |
| DH-Snacking – fruit                                    | 2           | 18.7 | 81.3  |      |      |      |      |   | 13.3   | 86.7 |      |      |      |      |   | ns       |
| DH-Snacking – vegetables                               | 2           | 51.6 | 48.4  |      |      |      |      |   | 41.3   | 58.7 |      |      |      |      |   | ns       |
| DH-Snacking – unsweetened dairy beverages and desserts | 2           | 64.9 | 35.11 |      |      |      |      |   | 67.6   | 32.4 |      |      |      |      |   | ns       |
| DH-Snacking – sweetened dairy beverages and desserts   | 2           | 83.6 | 16.4  |      |      |      |      |   | 79.6   | 20.4 |      |      |      |      |   | ns       |
| DH-Snacking – sweet snacks                             | 2           | 30.2 | 69.8  |      |      |      |      |   | 34.7   | 65.3 |      |      |      |      |   | ns       |
| DH-Snacking – savoury snacks                           | 2           | 55.6 | 44.4  |      |      |      |      |   | 52.0   | 48.0 |      |      |      |      |   | ns       |
| DH-Snacking – nuts, almonds, seeds                     | 2           | 46.7 | 53.3  |      |      |      |      |   | 49.8   | 50.2 |      |      |      |      |   | ns       |
| DH-Type of milk and dairy beverages (by fat content)   | 3           | 42.3 | 53.2  | 4.5  |      |      |      |   | 41.5   | 54.0 | 4.5  |      |      |      |   | ns       |
| DH-Type of heat treatment of meat – boiled             | 2           | 73.4 | 28.6  |      |      |      |      |   | 67.9   | 32.1 |      |      |      |      |   | ns       |
| DH-Type of heat treatment of meat – stewed             | 2           | 92.9 | 7.1   |      |      |      |      |   | 92.9   | 7.1  |      |      |      |      |   | ns       |

|                                                               |   |           |      |      |      |      |      |     |      |      |      |      |      |     |     |    |
|---------------------------------------------------------------|---|-----------|------|------|------|------|------|-----|------|------|------|------|------|-----|-----|----|
| DH-Type of heat treatment of meat – grilled                   | 2 | 58.0      | 41.5 |      |      |      |      |     | 60.7 | 39.3 |      |      |      |     |     | ns |
| DH-Type of heat treatment of meat – roasted                   | 2 | 72.2      | 27.8 |      |      |      |      |     | 68.8 | 31.2 |      |      |      |     |     | ns |
| DH-Type of heat treatment of meat – fried                     | 2 | 20.1      | 79.9 |      |      |      |      |     | 23.8 | 76.2 |      |      |      |     |     | ns |
| DH-Type of heat treatment of meat – I don't eat meat          | 2 | 84.4      | 15.6 |      |      |      |      |     | 84.4 | 15.6 |      |      |      |     |     | ns |
| DH-Type of bread spread                                       | 7 | 0.5       | 21.6 | 11.9 | 0.9  | 12.4 | 45.4 | 7.3 | 19.1 | 18.1 | 0.9  | 10.7 | 42.8 | 7.9 | 0.5 | ns |
| DH-Type of frying fat                                         | 6 | 2.3       | 21.1 | 65.9 | 5.1  | 5.6  | -    |     | 4.7  | 20.9 | 62.6 | 3.8  | 7.6  | 0.4 |     | ns |
| DH-Sweetening hot beverages                                   | 4 | 76.9      | 16.0 | 4.0  | 3.1  |      |      |     | 74.1 | 20.9 | 1.8  | 3.1  |      |     |     | ns |
| DH-Adding salt to meals                                       | 3 | 71.1<br>1 | 20.9 | 8.0  |      |      |      |     | 69.2 | 23.2 | 7.6  |      |      |     |     | ns |
| DH-Type of water consumed – I don't drink water               | 2 | 99.6      | 0.4  |      |      |      |      |     | 98.7 | 1.3  |      |      |      |     |     | ns |
| DH-Type of water consumed – still water                       | 2 | 20.4      | 79.6 |      |      |      |      |     | 21.3 | 78.7 |      |      |      |     |     | ns |
| DH-Type of water consumed – sparkling water                   | 2 | 61.8      | 38.2 |      |      |      |      |     | 64.9 | 35.1 |      |      |      |     |     | ns |
| DH-Type of water consumed – flavoured water                   | 2 | 88.0      | 12.0 |      |      |      |      |     | 87.1 | 12.9 |      |      |      |     |     | ns |
| FF-Vegetable oils, margarines, mixes of butter and margarines | 6 | 32.5      | 29.4 | 18.8 | 15.7 | 3.0  | 0.5  |     | 32.5 | 28.4 | 19.8 | 16.8 | 1.5  | 1.0 |     | ns |
| FF-Eggs                                                       | 6 | 5.6       | 27.9 | 31.5 | 31.0 | 3.6  | 5    |     | 7.1  | 27.9 | 27.9 | 33.5 | 3.0  | 0.5 |     | ns |
| FF-Potatoes (excluding chips and crisps)                      | 6 | 0.5       | 12.7 | 28.4 | 55.8 | 2.5  | 0.0  |     | 1.5  | 13.7 | 28.4 | 52.8 | 2.5  | 1.0 |     | ns |
| FF-Instant soups, ready-made soups                            | 6 | 35.0      | 37.1 | 12.2 | 11.7 | 3.6  | 0.5  |     | 33.5 | 37.6 | 12.2 | 12.2 | 4.6  | 0.0 |     | ns |
| FF-Tinned vegetables                                          | 6 | 29.4      | 56.3 | 8.1  | 6.1  | 0.0  | 0.0  |     | 32.0 | 49.7 | 11.2 | 6.6  | 0.5  | 0.0 |     | ns |

|                                                                               |   |      |      |      |      |      |      |  |      |      |      |      |      |      |  |      |
|-------------------------------------------------------------------------------|---|------|------|------|------|------|------|--|------|------|------|------|------|------|--|------|
| FF-Fruit juices                                                               | 6 | 12.2 | 40.6 | 21.3 | 20.3 | 3.0  | 2.5  |  | 9.6  | 43.7 | 21.3 | 19.8 | 4.1  | 1.5  |  | ns   |
| FF-Vegetable juices, fruit and vegetable juices                               | 6 | 26.4 | 45.2 | 16.2 | 11.7 | 0.5  | 0.0  |  | 28.9 | 40.1 | 19.3 | 10.7 | 1.0  | 0.0  |  | ns   |
| FF-Sweetened hot beverages                                                    | 6 | 6.6  | 11.7 | 11.2 | 25.9 | 24.9 | 19.8 |  | 5.6  | 6.6  | 10.7 | 30.5 | 21.3 | 25.4 |  | 0.05 |
| FF-Water                                                                      | 6 | 0.5  | 4.6  | 8.6  | 16.2 | 9.1  | 60.9 |  | 0.5  | 5.1  | 5.6  | 14.7 | 7.6  | 66.5 |  | ns   |
| LPD-Eating out                                                                | 5 | 3.2  | 50.2 | 22.6 | 19.0 | 5.0  |      |  | 3.7  | 53.4 | 20.2 | 18.3 | 4.6  |      |  | ns   |
| LPD-Type of alcohol usually consumed                                          | 4 | 39.3 | 28.0 | 23.1 | 9.7  |      |      |  | 36.0 | 31.7 | 22.0 | 10.3 |      |      |  | ns   |
| LPD-Smoking currently                                                         | 2 | 79.6 | 20.4 |      |      |      |      |  | 80.7 | 19.3 |      |      |      |      |  | ns   |
| LPD-Smoked in the past                                                        | 2 | 63.1 | 36.9 |      |      |      |      |  | 61.9 | 38.1 |      |      |      |      |  | ns   |
| LPD-Sleep time on weekdays                                                    | 3 | 19.6 | 77.3 | 3.1  |      |      |      |  | 21.2 | 75.2 | 3.6  |      |      |      |  | ns   |
| LPD-Sleep time on weekends                                                    | 3 | 4.4  | 57.4 | 38.2 |      |      |      |  | 5.4  | 56.0 | 38.6 |      |      |      |  | ns   |
| LPD-Time spend watching TV or using a computer                                | 5 | 7.1  | 26.2 | 35.6 | 24.4 | 3.6  | 3.1  |  | 4.5  | 26.6 | 35.1 | 24.3 | 8.1  | 1.4  |  | ns   |
| LPD-Physical activity at work/school                                          | 4 | 53.8 | 42.2 | 3.6  | 0.4  |      |      |  | 50.0 | 48.2 | 1.8  |      |      |      |  | ns   |
| LPD-Physical activity during leisure time                                     | 3 | 7.1  | 47.1 | 45.8 |      |      |      |  | 9.9  | 52.5 | 37.7 |      |      |      |  | 0.01 |
| LPD-Self-assessment of health status compared to other people of the same age | 3 | 9.3  | 72.9 | 17.8 |      |      |      |  | 9.4  | 73.1 | 17.5 |      |      |      |  | ns   |
| LPD-Self-assessment of nutrition knowledge                                    | 4 | 24.4 | 44.0 | 26.7 | 4.9  |      |      |  | 20.6 | 51.1 | 25.1 | 3.2  |      |      |  | ns   |
| LPD-Self-assessment of diet                                                   | 4 | 1.3  | 26.3 | 68.8 | 3.6  |      |      |  | 2.3  | 24.3 | 71.2 | 2.2  |      |      |  | ns   |
| LPD-Self-assessment of diet during weekdays compared to weekends              | 3 | 26.6 | 59.6 | 13.8 |      |      |      |  | 25.3 | 64.7 | 10.0 |      |      |      |  | ns   |

DH – dietary habits; FF – food frequency; LPD – lifestyle and personal data; ns: not statistically significant; p: significance level: 0.05; 0.01; 0.001; <0.001;

Table S2. Nutrition questionnaire according to the number of categories of responses in students from Slovakia (%).

| Questions                                              | $\Sigma$ | Test |      |      |      |      |      |   | Retest |      |      |      |      |      |   | p       |
|--------------------------------------------------------|----------|------|------|------|------|------|------|---|--------|------|------|------|------|------|---|---------|
|                                                        |          | 1    | 2    | 3    | 4    | 5    | 6    | 7 | 1      | 2    | 3    | 4    | 5    | 6    | 7 |         |
| DH-Number of meals a day                               | 5        | 2.5  | 6.6  | 28.4 | 43.2 | 19.3 |      |   | 1.0    | 5.1  | 37.1 | 38.1 | 18.2 | 0.5  |   | ns      |
| DH-Regularity of consuming meals                       | 3        | 45.6 | 50.8 | 3.6  |      |      |      |   | 42.6   | 54.3 | 3.1  |      |      |      |   | ns      |
| DH-Frequency of snacking between meals                 | 6        | 1.5  | 4.1  | 8.6  | 26.9 | 32.0 | 27.9 |   | 2.0    | 7.6  | 12.7 | 27.4 | 31.5 | 18.8 |   | < 0.001 |
| DH-Snacking – fruit                                    | 2        | 22.8 | 77.2 |      |      |      |      |   | 19.8   | 80.2 |      |      |      |      |   | ns      |
| DH-Snacking – vegetables                               | 2        | 64.5 | 35.5 |      |      |      |      |   | 51.8   | 48.2 |      |      |      |      |   | < 0.001 |
| DH-Snacking – unsweetened dairy beverages and desserts | 2        | 64.5 | 35.5 |      |      |      |      |   | 69.0   | 31.0 |      |      |      |      |   | ns      |
| DH-Snacking – sweetened dairy beverages and desserts   | 2        | 72.1 | 27.9 |      |      |      |      |   | 77.7   | 22.3 |      |      |      |      |   | ns      |
| DH-Snacking – sweet snacks                             | 2        | 80.2 | 19.8 |      |      |      |      |   | 72.6   | 27.4 |      |      |      |      |   | ns      |
| DH-Snacking – savoury snacks                           | 2        | 76.7 | 23.3 |      |      |      |      |   | 81.7   | 18.3 |      |      |      |      |   | 0.01    |
| DH-Snacking – nuts, almonds, seeds                     | 2        | 71.1 | 28.9 |      |      |      |      |   | 74.6   | 25.4 |      |      |      |      |   | ns      |
| DH-Type of milk and dairy beverages (by fat content)   | 3        | 62.9 | 35.1 | 2.0  |      |      |      |   | 64.0   | 33.5 | 2.5  |      |      |      |   | ns      |
| DH-Type of heat treatment of meat – boiled             | 2        | 23.4 | 76.6 |      |      |      |      |   | 19.8   | 80.2 |      |      |      |      |   | ns      |

|                                                               |   |      |      |      |      |      |     |     |      |      |      |      |      |     |     |      |
|---------------------------------------------------------------|---|------|------|------|------|------|-----|-----|------|------|------|------|------|-----|-----|------|
| DH-Type of heat treatment of meat – stewed                    | 2 | 39.6 | 60.4 |      |      |      |     |     | 35.5 | 64.5 |      |      |      |     |     | ns   |
| DH-Type of heat treatment of meat – grilled                   | 2 | 60.9 | 39.1 |      |      |      |     |     | 53.3 | 48.7 |      |      |      |     |     | 0.01 |
| DH-Type of heat treatment of meat – roasted                   | 2 | 30.0 | 70.0 |      |      |      |     |     | 31.5 | 68.5 |      |      |      |     |     | ns   |
| DH-Type of heat treatment of meat – fried                     | 2 | 59.9 | 40.1 |      |      |      |     |     | 59.9 | 40.1 |      |      |      |     |     | ns   |
| DH-Type of heat treatment of meat – I don't eat meat          | 2 | 98.0 | 2.0  |      |      |      |     |     | 96.4 | 3.6  |      |      |      |     |     | ns   |
| DH-Type of bread spread                                       | 7 | 13.2 | 6.6  | 0.5  | 1.1  | 75.1 | 2.5 | 1.0 | 14.7 | 6.6  | 2.0  | 2.0  | 69.5 | 3.1 | 2.1 | ns   |
| DH-Type of frying fat                                         | 6 | 2.5  | 6.1  | 76.7 | 0.5  | 6.1  | 8.1 |     | 1.0  | 9.6  | 76.1 | 7.1  | 6.2  |     |     | ns   |
| DH-Sweetening hot beverages                                   | 4 | 35.5 | 35.5 | 29.0 |      |      |     |     | 36.0 | 36.6 | 27.4 |      |      |     |     | ns   |
| DH-Adding salt to meals                                       | 3 | 46.2 | 45.7 | 8.1  |      |      |     |     | 47.2 | 45.7 | 7.1  |      |      |     |     | ns   |
| DH-Type of water consumed – I don't drink water               | 2 | 98.5 | 1.5  |      |      |      |     |     | 99.0 | 1.0  |      |      |      |     |     | ns   |
| DH-Type of water consumed – still water                       | 2 | 35.0 | 65.0 |      |      |      |     |     | 34.0 | 66.0 |      |      |      |     |     | ns   |
| DH-Type of water consumed – sparkling water                   | 2 | 68.0 | 33.0 |      |      |      |     |     | 69.5 | 30.5 |      |      |      |     |     | ns   |
| DH-Type of water consumed – flavoured water                   | 2 | 70.6 | 29.4 |      |      |      |     |     | 73.6 | 26.4 |      |      |      |     |     | ns   |
| FF-Vegetable oils, margarines, mixes of butter and margarines | 6 | 32.5 | 28.4 | 19.8 | 16.8 | 1.5  | 1.0 |     | 32.5 | 29.4 | 18.8 | 15.7 | 3.1  | 0.5 |     | ns   |
| FF-Eggs                                                       | 6 | 7.1  | 27.9 | 27.9 | 33.5 | 3.1  | 0.5 |     | 5.6  | 27.9 | 31.5 | 31.0 | 3.5  | 0.5 |     | ns   |
| FF-Potatoes (excluding chips and crisps)                      | 6 | 1.5  | 13.7 | 28.4 | 52.8 | 2.5  | 1.0 |     | 0.5  | 12.7 | 28.4 | 55.5 | 2.5  |     |     | ns   |
| FF-Instant soups, ready-made soups                            | 6 | 33.5 | 37.6 | 12.2 | 12.2 | 4.6  | -   |     | 35.0 | 37.1 | 12.2 | 11.7 | 3.6  | 0.5 |     | ns   |

|                                                                               |   |       |       |       |      |      |      |  |      |       |       |       |      |      |  |      |
|-------------------------------------------------------------------------------|---|-------|-------|-------|------|------|------|--|------|-------|-------|-------|------|------|--|------|
| FF-Tinned vegetables                                                          | 6 | 32.0  | 49.7  | 11.2  | 6.6  | 0.5  | -    |  | 29.4 | 56.4  | 8.1   | 6.1   |      |      |  | ns   |
| FF-Fruit juices                                                               | 6 | 9.6   | 43.7  | 21.3  | 19.8 | 4.1  | 1.5  |  | 12.2 | 40.6  | 21.3  | 20.3  | 3.1  | 2.5  |  | ns   |
| FF-Vegetable juices, fruit and vegetable juices                               | 6 | 29.4  | 40.1  | 18.8  | 10.7 | 1.0  | -    |  | 26.4 | 45.2  | 16.2  | 11.7  | 0.5  |      |  | ns   |
| FF-Sweetened hot beverages                                                    | 6 | 5.6   | 6.6   | 10.7  | 30.5 | 21.3 | 25.4 |  | 6.6  | 11.7  | 11.2  | 25.9  | 24.9 | 19.8 |  | 0.05 |
| FF-Water                                                                      | 6 | 0.5   | 5.1   | 5.6   | 14.7 | 7.6  | 66.5 |  | 0.5  | 4.6   | 8.6   | 16.2  | 9.1  | 60.9 |  | ns   |
| LPD-Eating out                                                                | 5 | 3.6   | 45.2  | 29.4  | 19.3 | 2.0  | 0.5  |  | 5.58 | 46.70 | 25.38 | 19.80 | 2.54 |      |  | ns   |
| LPD-Type of alcohol usually consumed                                          | 5 | 23.4  | 37.1  | 10.2  | 7.0  | 22.3 |      |  | 22.8 | 39.6  | 9.6   | 6.6   | 21.4 |      |  | ns   |
| LPD-Smoking currently                                                         | 2 | 77.7  | 22.3  |       |      |      |      |  | 77.2 | 22.8  |       |       |      |      |  | ns   |
| LPD-Smoked in the past                                                        | 2 | 64.0  | 36.0  |       |      |      |      |  | 66.5 | 33.5  |       |       |      |      |  | ns   |
| LPD-Sleep time on weekdays                                                    | 3 | 36.0  | 59.9  | 4.1   |      |      |      |  | 37.1 | 59.4  | 3.5   |       |      |      |  | ns   |
| LPD-Sleep time on weekends                                                    | 3 | 12.18 | 53.30 | 34.52 |      |      |      |  | 13.2 | 52.3  | 34.5  |       |      |      |  | ns   |
| LPD-Time spend watching TV or using a computer                                | 5 | 32.0  | 37.6  | 20.8  | 8.1  | 0.5  | 1.0  |  | 34.0 | 38.6  | 17.3  | 8.1   | 1.0  | 1.0  |  | ns   |
| LPD-Physical activity at work/school                                          | 4 | 25.9  | 65.0  | 9.14  |      |      |      |  | 23.9 | 69.0  | 7.1   |       |      |      |  | ns   |
| LPD-Physical activity during leisure time                                     | 3 | 21.32 | 65.48 | 13.20 |      |      |      |  | 18.3 | 72.6  | 9.1   |       |      |      |  | ns   |
| LPD-Self-assessment of health status compared to other people of the same age | 3 | 13.7  | 71.1  | 15.2  |      |      |      |  | 12.2 | 74.1  | 13.7  |       |      |      |  | ns   |
| LPD-Self-assessment of nutrition knowledge                                    | 4 | 8.6   | 44.2  | 41.6  | 5.6  |      |      |  | 8.1  | 42.1  | 6.1   |       |      |      |  | ns   |
| LPD-Self-assessment of diet                                                   | 4 | 3.1   | 26.4  | 2.5   |      |      |      |  | 1.5  | 26.0  | 1.0   |       |      |      |  | ns   |

|                                                                  |   |      |      |      |  |  |  |  |      |      |      |  |  |  |  |    |
|------------------------------------------------------------------|---|------|------|------|--|--|--|--|------|------|------|--|--|--|--|----|
| LPD-Self-assessment of diet during weekdays compared to weekends | 3 | 34.5 | 50.8 | 14.7 |  |  |  |  | 31.5 | 52.8 | 15.7 |  |  |  |  | ns |
|------------------------------------------------------------------|---|------|------|------|--|--|--|--|------|------|------|--|--|--|--|----|

DH – dietary habits; FF – food frequency; LPD – lifestyle and personal data; ns: not statistically significant; p: significance level: 0.05; 0.01; 0.001; <0.001;
